# Supplementary material
Source: PubMed Central journal article supplement (PMC6324997)

## Appendix Figure 1: Pre-defined subgroup analysis

**Legend:** The magnitude of intervention effect for mailed outreach alone (panel A) and outreach/navigation (panel B) compared to usual care was similar in racial/ethnic (white vs. non-white) and cirrhosis (documented vs. suspected diagnosis) subgroups; however, intervention effect varied by receipt of hepatology care in year prior to randomization and Child Pugh class. There was no observed effect modification comparing outreach-alone versus outreach/navigation by any patient characteristic (panel C).

**Appendix Table 1:** Hepatocellular carcinoma outcomes, by study group and screening status

| Intervention Group             | Early Stage Diagnosis among Screen Detected HCC |                                   | Early Stage Diagnosis among Non-screen Detected HCC |                               |
|--------------------------------|-------------------------------------------------|-----------------------------------|-----------------------------------------------------|-------------------------------|
|                                | <i>n</i>                                        | <i>% of study group, (95% CI)</i> | <i>n</i>                                            | <i>% of all HCC, (95% CI)</i> |
| Outreach/Navigation<br>(n=600) | 5 of 6                                          | 83.3 (35.9 – 99.6)                | 2 of 5                                              | 40.0 (5.3 – 85.3)             |
| Outreach Alone<br>(n=600)      | 3 of 4                                          | 75.0 (19.4 – 99.4)                | 1 of 2                                              | 50.0 (1.3 – 98.7)             |
| Usual Care<br>(n=600)          | 7 of 8                                          | 87.5 (47.4 – 99.7)                | 1 of 6                                              | 16.7 (0.4 – 64.1)             |
| Overall<br>(n=1800)            | 15 of 18                                        | 83.3 (58.6 – 96.4)                | 4 of 13                                             | 30.8 (9.1 – 61.4)             |

<sup>a</sup> Early HCC was defined as Barcelona Clinic Liver Cancer (BCLC) stage 0 or stage A.

**Appendix Table 2:** HCC surveillance completion <sup>a</sup> over 21-month study period

| Study Group                 | HCC Surveillance <sup>a</sup> Completed (n) | Proportion Surveillance Completed (95% CI) | Difference in Proportion of Surveillance Completed by Group (95% CI) |                    |
|-----------------------------|---------------------------------------------|--------------------------------------------|----------------------------------------------------------------------|--------------------|
|                             |                                             |                                            | vs. Usual Care                                                       | vs. Outreach Alone |
| Outreach/Navigation (n=600) | 169                                         | 28.2 (24.6 – 31.8)                         | +18.7 (14.4 – 23.0)                                                  | +7.4 (2.5 – 12.2)  |
| Outreach Alone (n=600)      | 125                                         | 20.8 (17.6 – 24.1)                         | +11.3 (7.3 – 15.3)                                                   | ---                |
| Usual Care (n=600)          | 57                                          | 9.5 (5.4 – 9.7)                            | ---                                                                  | ---                |

<sup>a</sup> Surveillance was defined as receipt of abdominal imaging during each 7-month period after randomization.

**Appendix Table 3:** Any HCC screening completion over 18-month study period

| Total screens completed                          | Usual Care<br>(n=600)<br>n (%) |               | Outreach Alone<br>(n=600)<br>n (%) |               | Outreach/Navigation<br>(n=600)<br>n (%) |               |
|--------------------------------------------------|--------------------------------|---------------|------------------------------------|---------------|-----------------------------------------|---------------|
|                                                  | n                              | (%)           | n                                  | (%)           | n                                       | (%)           |
| <b>1 Screen</b>                                  | <b>156</b>                     | <b>(26.0)</b> | <b>139</b>                         | <b>(23.2)</b> | <b>132</b>                              | <b>(22.0)</b> |
| 1 <sup>st</sup> 6-month period                   | 50                             | (8.3)         | 59                                 | (9.8)         | 56                                      | (9.3)         |
| 2 <sup>nd</sup> 6-month period                   | 61                             | (10.2)        | 47                                 | (7.8)         | 43                                      | (7.2)         |
| 3 <sup>rd</sup> 6-month period                   | 45                             | (7.5)         | 33                                 | (5.5)         | 33                                      | (5.5)         |
| <b>2 Screen</b>                                  | <b>81</b>                      | <b>(13.5)</b> | <b>153</b>                         | <b>(25.5)</b> | <b>143</b>                              | <b>(23.8)</b> |
| 1 <sup>st</sup> & 2 <sup>nd</sup> 6-month period | 32                             | (5.3)         | 54                                 | (9.0)         | 46                                      | (7.7)         |
| 2 <sup>nd</sup> & 3 <sup>rd</sup> 6-month period | 25                             | (4.2)         | 50                                 | (8.3)         | 50                                      | (8.3)         |
| 1 <sup>st</sup> & 3 <sup>rd</sup> 6-month period | 24                             | (4.0)         | 49                                 | (8.2)         | 47                                      | (7.8)         |
| <b>3 Screens</b>                                 | <b>44</b>                      | <b>(7.3)</b>  | <b>107</b>                         | <b>(17.8)</b> | <b>140</b>                              | <b>(23.3)</b> |

A

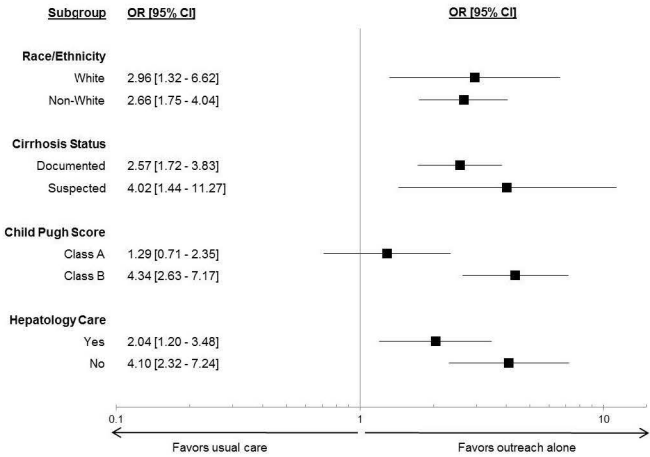

B

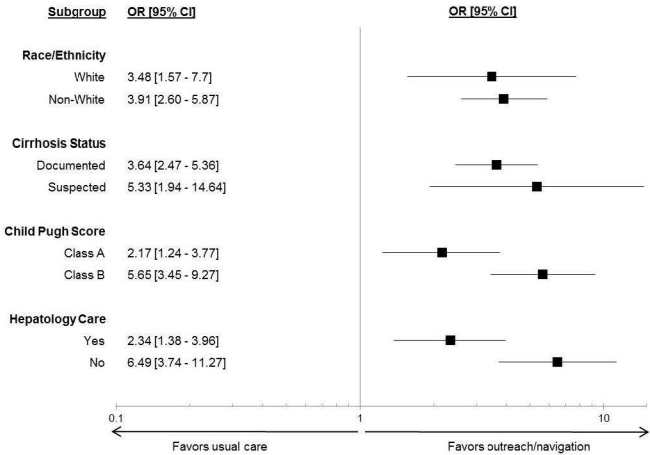

C

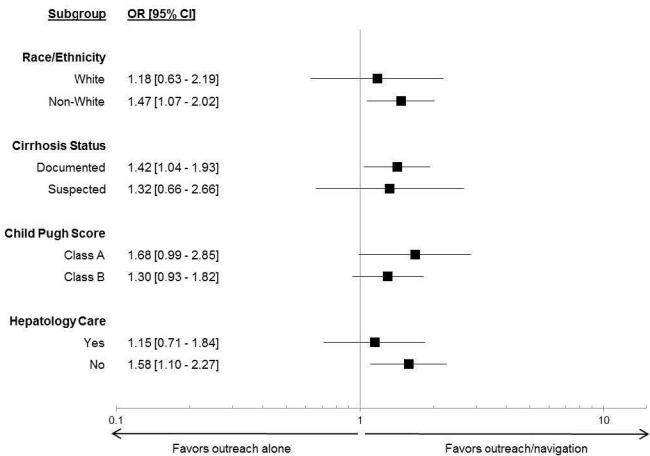

Supplement: NIHMS972875-supplement-Supp_info.pdf [file NIHMS972875-supplement-Supp_info.pdf]
